# Supplementary material for: ‘Never again will I be carefree’: a qualitative study of the impact of hypoglycemia on quality of life among adults with type 1 diabetes
Source: PubMed Central journal article supplement — BMJ Open Diabetes Res Care. 2021 Aug 16;9(1):e002322. doi: 10.1136/bmjdrc-2021-002322 (PMC8370551; doi:10.1136/bmjdrc-2021-002322), 2021-08-16
Supplement: bmjdrc-2021-002322supp001.pdf [file bmjdrc-2021-002322supp001.pdf]

**Supplemental Table S1. Comparison of Included and Excluded Participants on Core Demographic and Clinical Characteristics.**

|                                                                  | Included ( <i>n</i> =219) | Excluded ( <i>n</i> =18) | Between-Groups Difference      |
|------------------------------------------------------------------|---------------------------|--------------------------|--------------------------------|
| Age ( <i>M, SD</i> )                                             | 39.4 (13.3)               | 37.4 (13.5)              | <i>p</i> =.552                 |
| Gender (Females; %, <i>n</i> )                                   | 83.1 (182)                | 55.6 (10)                | Fisher's=8.349, <i>p</i> =.015 |
| Country of residence (%, <i>n</i> )                              |                           |                          |                                |
| Denmark                                                          | 18.7 (41)                 | 44.4 (8)                 | <i>p</i> =.073                 |
| Germany                                                          | 23.3 (51)                 | 11.1 (2)                 |                                |
| The Netherlands                                                  | 30.1 (66)                 | 22.2 (4)                 |                                |
| United Kingdom                                                   | 27.9 (61)                 | 22.2 (4)                 |                                |
| Current living situation (%, <i>n</i> ) †                        |                           |                          |                                |
| Alone                                                            | 16.0 (35)                 | 5.6 (1)                  | <i>p</i> =.236                 |
| With spouse/partner                                              | 68.9 (151)                | 66.7 (12)                | <i>p</i> =.841                 |
| With child(ren)                                                  | 27.9 (61)                 | 44.4 (8)                 | <i>p</i> =.136                 |
| With parent(s)                                                   | 11.0 (24)                 | 5.6 (1)                  | <i>p</i> =.473                 |
| Other                                                            | 2.7 (6)                   | 11.1 (2)                 | <i>p</i> =.059                 |
| Employment (%, <i>n</i> ) †                                      |                           |                          |                                |
| Full-time                                                        | 42.0 (92)                 | 38.9 (7)                 | <i>p</i> =.796                 |
| Part-time                                                        | 23.3 (51)                 | 11.1 (2)                 | <i>p</i> =.233                 |
| Self-employed                                                    | 4.1 (9)                   | 5.6 (1)                  | <i>p</i> =.769                 |
| Unemployed                                                       | 5.9 (13)                  | 11.1 (2)                 | <i>p</i> =.386                 |
| Unpaid worker                                                    | 2.7 (6)                   | 16.7 (3)                 | <i>p</i> =.003*                |
| Student                                                          | 16.4 (36)                 | 22.2 (4)                 | <i>p</i> =.529                 |
| Retired                                                          | 5.5 (12)                  | 5.6 (1)                  | <i>p</i> =.989                 |
| Other                                                            | 5.9 (13)                  | 0.0 (0)                  | <i>p</i> =.288                 |
| Most recent educational qualification completed (%, <i>n</i> ) † |                           |                          |                                |
| Secondary school or lower                                        | 15.5 (34)                 | 16.7 (3)                 | <i>p</i> =.683                 |
| Further education                                                | 27.4 (60)                 | 22.2 (4)                 | <i>p</i> =.635                 |
| Bachelor                                                         | 30.6 (67)                 | 38.9 (7)                 | <i>p</i> =.465                 |
| Master                                                           | 21.5 (47)                 | 16.7 (3)                 | <i>p</i> =.632                 |
| PhD                                                              | 4.1 (9)                   | 0.0 (0)                  | <i>p</i> =.381                 |
| Other                                                            | 5.5 (12)                  | 5.6 (1)                  | <i>p</i> =.989                 |

| Frequency of hypoglycemia ( <i>Median, IQR</i> )                      |               |               |                                  |
|-----------------------------------------------------------------------|---------------|---------------|----------------------------------|
| Number of episodes in past week                                       | 3.5 (2.0-6.0) | 3.3 (3.0-5.3) | <i>p</i> =.643                   |
| ≥1 Episode needing help from others in the past year                  | 32 (70)       | 35 (6)        | <i>p</i> =.778                   |
| Hypoglycemia awareness status ( <i>%</i> , <i>n</i> )                 |               |               |                                  |
| Impaired (Gold score ≥4)                                              | 39.7 (87)     | 38.9 (7)      | <i>p</i> =.945                   |
| HypoA-Q IA Subscale ( <i>M</i> , <i>SD</i> )                          | 7.6 (3.8)     | 7.7 (4.2)     | <i>t</i> =-0.083, <i>p</i> =.934 |
| Fear of hypoglycemia, HFS-SF Worry Subscale ( <i>M</i> , <i>SD</i> )* | 10.5 (5.3)    | 13.9 (4.6)    | <i>t</i> =-2.568, <i>p</i> =.011 |

HFS-SF = Hypoglycemia Fear Survey Short Form.

\* Higher scores indicate greater fear of hypoglycemia (out of a possible 24).

† Participants were able to select more than one response option.

Note: Between-group differences in annual net income, diabetes duration, treatment regimen, and comorbidities could not be examined due to missing data.

**Supplemental Table S2. Participants' Demographic, Clinical, and Psychological Characteristics.**

|                                                           | Overall<br>(N=219) | Denmark<br>(n=41) | Germany<br>(n=51) | Netherlands<br>(n=66) | United Kingdom<br>(n=61) | Between-<br>Country<br>Difference |
|-----------------------------------------------------------|--------------------|-------------------|-------------------|-----------------------|--------------------------|-----------------------------------|
| Age (M, SD)                                               | 39.4 (13.3)        | 40.2 (13.4)       | 37.8 (13.9)       | 36.5 (14.1)*          | 43.3 (10.8)*             | F=3.070, p=.029                   |
| Gender (% , n)                                            |                    |                   |                   |                       |                          |                                   |
| Female                                                    | 83.1 (182)         | 90.2 (37)         | 82.4 (42)         | 81.8 (54)             | 80.3 (49)                | p=.511                            |
| Male                                                      | 16.4 (36)          | 9.8 (4)           | 15.7 (8)          | 18.2 (12)             | 19.7 (12)                |                                   |
| Other                                                     | 0.5 (1)            | 0.0 (0)           | 2.0 (1)           | 0.0 (0)               | 0.0 (0)                  |                                   |
| Nationality (% , n)                                       |                    |                   |                   |                       |                          |                                   |
| Danish                                                    | 18.3 (40)          | 95.1 (39)         | 2.0 (1)           | 0.0 (0)               | 0.0 (0)                  | p<.001                            |
| Dutch                                                     | 29.7 (65)          | 2.4 (1)           | 0.0 (0)           | 97.0 (64)             | 0.0 (0)                  |                                   |
| English                                                   | 17.4 (38)          | 0.0 (0)           | 0.0 (0)           | 0.0 (0)               | 62.3 (38)                |                                   |
| German                                                    | 21.9 (48)          | 0.0 (0)           | 94.1 (48)         | 0.0 (0)               | 0.0 (0)                  |                                   |
| Indian                                                    | 0.9 (2)            | 0.0 (0)           | 3.9 (2)           | 0.0 (0)               | 0.0 (0)                  |                                   |
| Irish                                                     | 2.3 (5)            | 0.0 (0)           | 0.0 (0)           | 0.0 (0)               | 8.2 (5)                  |                                   |
| Moroccan                                                  | 0.5(1)             | 0.0 (0)           | 0.0 (0)           | 1.5 (1)               | 0.0 (0)                  |                                   |
| Romanian                                                  | 0.5 (1)            | 0.0 (0)           | 0.0 (0)           | 1.5 (1)               | 0.0 (0)                  |                                   |
| Scottish                                                  | 5.9 (13)           | 2.4 (1)           | 0.0 (0)           | 0.0 (0)               | 19.7 (12)                |                                   |
| Welsh                                                     | 0.9 (2)            | 0.0 (0)           | 0.0 (0)           | 0.0 (0)               | 3.3 (2)                  |                                   |
| Other                                                     | 1.4 (3)            | 0.0 (0)           | 0.0 (0)           | 0.0 (0)               | 4.9 (3)                  |                                   |
| Most recent educational qualification completed (% , n) † |                    |                   |                   |                       |                          |                                   |
| Secondary school or lower                                 | 15.1 (33)          | 17.1 (7)          | 17.6 (9)          | 13.6 (9)              | 13.1 (8)                 | p=.880                            |
| Further education                                         | 27.4 (60)          | 31.7 (13)         | 37.3 (19)         | 27.5 (18)             | 16.4 (10)                | p=.086                            |
| Bachelor                                                  | 30.6 (67)          | 17.1 (7)*         | 21.6 (11)         | 42.4 (28)*            | 34.4 (21)                | p=.016                            |
| Master                                                    | 21.5 (47)          | 24.4 (10)*        | 17.6 (9)          | 18.2 (12)*            | 26.2 (16)                | p=.595                            |
| PhD                                                       | 4.1 (9)            | 0.0 (0)           | 9.8 (5)           | 1.5 (1)               | 4.9 (3)                  | p=.066                            |
| Other                                                     | 5.5 (12)           | 14.6 (6)          | 2.0 (1)           | 0.0 (0)               | 8.2 (5)                  | p=.006                            |
| Employment (% , n) †                                      |                    |                   |                   |                       |                          |                                   |
| Full-time                                                 | 42.0 (92)          | 43.9 (18)         | 43.1 (22)         | 24.2 (16)*            | 59.0 (36)*               | p=.001                            |
| Part-time                                                 | 23.3 (51)          | 9.8 (4)*          | 23.5 (12)         | 37.9 (25)*            | 16.4 (10)                | p=.003                            |

|                                            |                |                                 |                               |                               |                              |                   |
|--------------------------------------------|----------------|---------------------------------|-------------------------------|-------------------------------|------------------------------|-------------------|
| Self-employed                              | 4.1 (9)        | 0.0 (0)                         | 0.0 (0)                       | 10.6 (7)                      | 3.3 (2)                      | $p=.011$          |
| Unemployed                                 | 5.9 (13)       | 14.6 (6)                        | 2.0 (1)                       | 4.5 (3)                       | 4.9 (3)                      | $p=.062$          |
| Unpaid worker                              | 2.7 (6)        | 2.4 (1)                         | 2.0 (1)                       | 6.1 (4)                       | 0.0 (0)                      | $p=.205$          |
| Student                                    | 16.4 (36)      | 12.2 (5)                        | 19.6 (10)                     | 21.2 (14)                     | 11.5 (7)                     | $p=.377$          |
| Retired                                    | 5.5 (12)       | 12.2 (5)                        | 7.8 (4)                       | 1.5 (1)                       | 3.3 (2)                      | $p=.082$          |
| Other                                      | 5.9 (13)       | 9.8 (4)                         | 3.9 (2)                       | 9.1 (6)                       | 1.6 (1)                      | $p=.201$          |
| Annual net income (% , n)                  |                |                                 |                               |                               |                              |                   |
|                                            | ‡              | 19.5 (8)                        | 37.3 (19)<br><€35,000         | 65.2 (43)<br><€40,000         | 27.9 (17)<br><£30,000        | ‡                 |
|                                            | ‡              | 43.9 (18)<br>200-<br>600,000DKK | 41.2 (21)<br>€35-80,000       | 21.2 (14)<br>€40-80,000       | 52.5 (32)<br>£30-70,000      | ‡                 |
|                                            | ‡              | 26.8 (11)<br>>600,000DKK        | 7.8 (4)<br>>€80,000           | 3.0 (2)<br>>€80,000           | 14.8 (9)<br>>£70,000         | ‡                 |
|                                            | ‡              | 9.8 (4)<br>Prefer not to say    | 13.7 (7)<br>Prefer not to say | 10.6 (7)<br>Prefer not to say | 4.9 (3)<br>Prefer not to say | ‡                 |
| Current living situation (% , n) †         |                |                                 |                               |                               |                              |                   |
| Alone                                      | 16.0 (35)      | 17.1 (7)                        | 17.6 (9)                      | 16.7 (11)                     | 13.1 (8)                     | $p=.910$          |
| With spouse/partner                        | 68.9 (151)     | 68.3 (28)                       | 70.6 (36)                     | 60.6 (40)                     | 77.0 (47)                    | $p=.252$          |
| With child(ren)                            | 27.9 (61)      | 24.4 (10)                       | 25.5 (13)                     | 25.8 (17)                     | 34.4 (21)                    | $p=.606$          |
| With parent(s)                             | 11.0 (24)      | 4.9 (2)                         | 13.7 (7)                      | 18.2 (12)                     | 4.9 (3)                      | $p=.051$          |
| Other                                      | 2.7 (6)        | 0.0 (0)                         | 0.0 (0)                       | 6.1 (4)                       | 3.3 (2)                      | $p=.145$          |
| Diabetes duration (M, SD)                  | 20.4 (14.1)    | 18.8 (15.3)*                    | 18.3 (14.3)                   | 18.3 (12.2)                   | 25.8 (14.1)*                 | $F=3.666, p=.013$ |
| Treatment (% , n) †                        |                |                                 |                               |                               |                              |                   |
| MDIs                                       | 47 (102)       | 68 (28)*                        | 43 (22)                       | 36 (24)*                      | 46 (28)                      | $p=0.012$         |
| Insulin pump                               | 53 (116)       | 32 (13)*                        | 57 (29)                       | 65 (43)*                      | 51 (31)                      | $p=0.008$         |
| DIY                                        | 5 (11)         | 2 (1)                           | 6 (3)                         | 6 (4)                         | 5 (3)                        | $p=0.851$         |
| Frequency of hypoglycemia (HypoA-Q)        |                |                                 |                               |                               |                              |                   |
| Episodes in past week (Mdn, IQR)           | 3.5 (2.0-6.0)* | 3.0 (1.3-4.8)                   | 4.0 (2.0-6.0)                 | 4.0 (2.0-6.0)                 | 4.0 (3.0-7.0)*               | $F=2.795, p=.041$ |
| ≥1 Episode needing help from others in the | 32.0 (70)      | 24.4 (10)                       | 39.2 (20)                     | 36.4 (24)                     | 26.2 (16)                    | $p=.284$          |

|                                                                   |            |            |            |            |            |                                 |
|-------------------------------------------------------------------|------------|------------|------------|------------|------------|---------------------------------|
| past year (% , n)                                                 |            |            |            |            |            |                                 |
| Frequency of self-treated episodes in past 12 months (% , n)      |            |            |            |            |            |                                 |
| Never                                                             | 1.4 (3)    | 2.4 (1)    | 2.0 (1)    | 0.0 (0)    | 1.6 (1)    | <i>p</i> =.276                  |
| 1-2 times                                                         | 1.8 (4)    | 2.4 (1)    | 3.9 (2)    | 0.0 (0)    | 1.6 (1)    |                                 |
| 3-4 times                                                         | 3.7 (8)    | 4.9 (2)    | 3.9 (2)    | 4.5 (3)    | 1.6 (1)    |                                 |
| 1-2 times/month                                                   | 14.2 (31)  | 24.4 (10)  | 9.8 (5)    | 18.2 (12)  | 6.6 (4)    |                                 |
| 1 time/week                                                       | 16.9 (37)  | 19.5 (8)   | 23.5 (12)  | 12.1 (8)   | 14.8 (9)   |                                 |
| 1+ times/week                                                     | 62.1 (136) | 46.3 (19)  | 56.9 (29)  | 65.2 (43)  | 73.8 (45)  |                                 |
| Hypoglycemia awareness status                                     |            |            |            |            |            |                                 |
| Gold Score                                                        |            |            |            |            |            |                                 |
| <i>M (SD)</i>                                                     | 3.4 (1.7)  | 3.5 (1.9)  | 3.2 (1.5)  | 3.4 (1.5)  | 3.3 (1.7)  | <i>p</i> =.706                  |
| Impaired (Gold ≥4)<br>(% , n)                                     | 39.7 (87)  | 46.3 (19)  | 31.4 (16)  | 40.9 (27)  | 41.0 (35)  | <i>p</i> =.510                  |
| HypoA-Q IA Scale<br>( <i>M, SD</i> ) §                            | 7.8 (4.4)  | 7.4 (4.9)  | 7.2 (4.2)  | 8.3 (4.0)  | 8.2 (4.7)  | <i>F</i> =0.824, <i>p</i> =.482 |
| Comorbidities (% , n) †                                           |            |            |            |            |            |                                 |
| Diabetes-related                                                  | 3.8 (9)    | 0.0 (0)    | 5.2 (3)    | 4.2 (3)    | 4.5 (3)    | <i>p</i> =.139                  |
| Other                                                             | 47.5 (114) | 57.8 (26)  | 44.8 (26)  | 34.7 (31)  | 47.0 (31)  |                                 |
| None                                                              | 47.5 (114) | 42.2 (19)  | 44.8 (26)  | 52.1 (37)  | 48.5 (32)  |                                 |
| Prefer not to say                                                 | 1.3 (3)    | 0.0 (0)    | 5.2 (3)    | 0.0 (0)    | 0.0 (0)    |                                 |
| Fear of hypoglycemia:<br>HFS-SF Worry Scale<br>( <i>M, SD</i> ) ¶ | 10.5 (5.3) | 10.5 (5.4) | 11.7 (5.9) | 9.9 (5.1)  | 10.1 (4.7) | <i>p</i> =.277                  |
| Adapted DIDP: Impact of COVID-19 pandemic on QoL #                |            |            |            |            |            |                                 |
| Total Score                                                       | 3.3 (0.8)  | 3.2 (0.6)  | 3.3 (0.77) | 3.5 (0.8)  | 3.2 (0.8)  | <i>p</i> =.078                  |
| Diabetes                                                          | 3.6 (1.3)  | 3.4 (1.0)  | 3.8 (1.35) | 3.8 (1.0)  | 3.3 (1.5)  | <i>p</i> =.090                  |
| Sleep                                                             | 3.6 (1.2)  | 3.5 (0.8)  | 3.8 (1.14) | 3.9 (1.2)* | 3.3 (1.2)* | <i>p</i> =.019                  |
| Health                                                            | 3.7 (1.2)  | 3.6 (0.9)  | 3.8 (1.22) | 3.9 (1.3)* | 3.4 (1.4)* | <i>p</i> =.129                  |
| Wellbeing                                                         | 3.0 (1.2)  | 3.0 (0.9)  | 3.0 (1.32) | 3.3 (1.2)  | 2.9 (1.2)  | <i>p</i> =.197                  |
| Finance                                                           | 3.7 (1.1)  | 3.7 (0.9)  | 3.5 (1.16) | 3.9 (0.9)  | 3.8 (1.3)  | <i>p</i> =.300                  |
| Relationship                                                      | 3.3 (1.2)  | 3.0 (1.1)  | 3.1 (1.25) | 3.4 (1.2)  | 3.6 (1.3)  | <i>p</i> =.064                  |
| Leisure                                                           | 2.8 (1.4)  | 2.6 (1.2)  | 2.7 (1.43) | 3.1 (1.3)  | 2.6 (1.5)  | <i>p</i> =.163                  |
| Work                                                              | 3.1 (1.4)  | 2.7 (1.1)  | 3.1 (1.54) | 3.2 (1.3)  | 3.1 (1.4)  | <i>p</i> =.330                  |

|        |           |           |            |           |           |                |
|--------|-----------|-----------|------------|-----------|-----------|----------------|
| Future | 3.0 (1.1) | 2.8 (1.1) | 3.1 (1.17) | 3.4 (1.1) | 2.8 (1.0) | <i>p</i> =.018 |
|--------|-----------|-----------|------------|-----------|-----------|----------------|

Between-country differences were analyzed using one-way ANOVAs and Chi-square tests. DIDP = DAWN2 Impact of Diabetes Profile; HypoA-Q = Hypoglycaemia Awareness Questionnaire; HFS-SF = Hypoglycemia Fear Survey Short Form; IA = Impaired Awareness; MDIs = Multiple daily injections; DIY = Do-it-yourself technologies (e.g., closed-loop systems).

\* Group implicated in statistically significant difference.

† Participants were able to select more than one response option.

‡ Cannot be calculated due to inequivalent country-specific income brackets.

§ Higher scores indicate greater self-reported impairment of hypoglycemia awareness (out of a possible 20).

|| Other comorbidities include autoimmune conditions, psychiatric conditions, and other physical health problems.

¶ Higher scores indicate greater fear of hypoglycemia (out of a possible 24).

# Lower scores indicate more significant negative impact (1 = *Very negative impact* to 7 = *Very positive impact*)

**Supplemental Table S3. Between-Country Differences in the Number of Times QoL Domains were Nominated by Participants.**

| QoL Domain                    | Overall | Denmark | Germany | Netherlands | United Kingdom | Between-Country Difference |
|-------------------------------|---------|---------|---------|-------------|----------------|----------------------------|
| Relationships and Social Life | 233     | 44      | 59      | 63          | 67             | $p=.527$                   |
| Work and Study                | 176     | 31      | 41      | 61          | 43             | $p=.341$                   |
| Leisure and Physical Activity | 175     | 27      | 47      | 54          | 47             | $p=.899$                   |
| Everyday Life                 | 137     | 16      | 36      | 46          | 39             | $p=.405$                   |
| Sleep                         | 80      | 12      | 19      | 17          | 32             | $p=.086$                   |
| Sex Life                      | 34      | 6       | 12      | 11          | 5              | $p=.275$                   |
| Physical Health               | 24      | 5       | 3       | 7           | 9              | $p=.456$                   |
| Mental Health                 | 10      | 1       | 2       | 2           | 5              | $p=.502$                   |

Note that QoL domains may have been nominated several times by a single participant, where they referred to that domain in different ways across entries (e.g., “Work meetings”, “Working life”, and “Talks with colleagues”).

**Supplemental Table S4. Gender Differences in the Number of Times QoL Domains were Nominated.**

| QoL Domain                    | Overall | Female | Male | Between-Groups Difference |
|-------------------------------|---------|--------|------|---------------------------|
| Relationships and Social Life | 233     | 206    | 27   | $p=.034^*$                |
| Work and Study                | 175     | 145    | 30   | $p=.625$                  |
| Leisure and Physical Activity | 174     | 142    | 32   | $p=.322$                  |
| Everyday Life                 | 136     | 115    | 21   | $p=.864$                  |
| Sleep                         | 80      | 69     | 11   | $p=.575$                  |
| Sex Life                      | 34      | 25     | 9    | $p=.087$                  |
| Physical Health               | 24      | 19     | 5    | $p=.506$                  |
| Mental Health                 | 10      | 7      | 3    | $p=.222$                  |

Note that QoL domains may have been nominated several times by a single participant, where they referred to that domain in different ways across entries (e.g., “Work meetings”, “Working life”, and “Talks with colleagues”).



**Supplemental Table S5. Between-Groups Differences in the Number of Times QoL Domains were Nominated.**

| QoL Domain                    | Overall | Severe Hypoglycemia<br>Past Year | No Severe Hypoglycemia<br>Past Year | Between-Groups<br>Difference |
|-------------------------------|---------|----------------------------------|-------------------------------------|------------------------------|
| Relationships and Social Life | 233     | 79                               | 154                                 | <i>p</i> =.408               |
| Work and Study                | 176     | 64                               | 112                                 | <i>p</i> =.943               |
| Leisure and Physical Activity | 175     | 62                               | 113                                 | <i>p</i> =.828               |
| Everyday Life                 | 137     | 51                               | 86                                  | <i>p</i> =.772               |
| Sleep                         | 80      | 30                               | 50                                  | <i>p</i> =.789               |
| Sex Life                      | 34      | 16                               | 18                                  | <i>p</i> =.176               |
| Physical Health               | 24      | 10                               | 14                                  | <i>p</i> =.567               |
| Mental Health                 | 10      | 8                                | 2                                   | <i>p</i> =.285               |

Note that QoL domains may have been nominated several times by a single participant, where they referred to that domain in different ways across entries (e.g., “Work meetings”, “Working life”, and “Talks with colleagues”).

**Supplemental Table S6. Between-Country Differences in the Number of Meaningful Data Extracts Coded to QoL Domains.**

| Domain / Country              | Overall | Denmark | Germany | Netherlands | UK | Between-Country Difference |
|-------------------------------|---------|---------|---------|-------------|----|----------------------------|
| Relationships and Social Life | 141     | 36      | 31      | 38          | 36 | $p=.064$                   |
| Work and Study                | 148     | 25      | 39      | 50          | 34 | $p=.153$                   |
| Leisure and Physical Activity | 122     | 15      | 40*     | 41          | 26 | $p=.040^*$                 |
| Everyday Life                 | 89      | 13      | 26      | 30          | 20 | $p=.557$                   |
| Sleep                         | 62      | 8       | 20      | 15          | 19 | $p=.470$                   |
| Sex Life                      | 24      | 5       | 9       | 6           | 4  | $p=.278$                   |
| Physical Health               | 14      | 2       | 3       | 6           | 3  | $p=.752$                   |
| Mental Health                 | 35      | 7       | 3       | 18*         | 7  | $p=.021^*$                 |

**Supplemental Table S7. Gender Differences in the Number of Meaningful Data Extracts Coded to QoL Domains.**

| Domain / Gender               | Overall | Females | Males | Between-Groups Difference |
|-------------------------------|---------|---------|-------|---------------------------|
| Relationships and Social Life | 105     | 88      | 17    | $p=.901$                  |
| Work and Study                | 120     | 106*    | 14    | $p=.033^*$                |
| Leisure and Physical Activity | 93      | 77      | 16    | $p=.813$                  |
| Everyday Life                 | 70      | 58      | 12    | $p=.863$                  |
| Sleep                         | 55      | 50      | 5     | $p=.086$                  |
| Sex Life                      | 24      | 17      | 7     | $p=.077$                  |
| Physical Health               | 14      | 13      | 1     | $p=.329$                  |
| Mental Health                 | 26      | 22      | 4     | $p=.869$                  |

**Supplemental Table S8. Between-Groups Differences in the Number of Meaningful Data Extracts Coded to QoL Domains.**

| Domain / Gender               | Overall | Severe Hypoglycemia<br>Past Year | No Severe Hypoglycemia<br>Past Year | Between-Groups<br>Difference |
|-------------------------------|---------|----------------------------------|-------------------------------------|------------------------------|
| Relationships and Social Life | 105     | 41                               | 64                                  | $p=.379$                     |
| Work and Study                | 121     | 50                               | 71                                  | $p=.072$                     |
| Leisure and Physical Activity | 94      | 36                               | 58                                  | $p=.552$                     |
| Everyday Life                 | 70      | 20                               | 50                                  | $p=.113$                     |
| Sleep                         | 55      | 18                               | 37                                  | $p=.550$                     |
| Sex Life                      | 24      | 13                               | 11                                  | $p=.050^*$                   |
| Physical Health               | 14      | 7                                | 7                                   | $p=.262$                     |
| Mental Health                 | 27      | 10                               | 17                                  | $p=.911$                     |
